# Supplementary material for: Genomic Expression Analyses Reveal Lysosomal, Innate Immunity Proteins, as Disease Correlates in Murine Models of a Lysosomal Storage Disorder
Source: PLoS One. 2012 Oct 19;7(10):e48273. doi: 10.1371/journal.pone.0048273 (PMC3477142; doi:10.1371/journal.pone.0048273)
Supplement: Table S1 — List of differentially expressed genes in the brain across the life span (20–84 days) of Npc1−/− mice. Up regulated innate immunity genes listed in InnateDB are shown in bold letters. (XLS) [file pone.0048273.s004.xls]

## Sheet: Brain gene list
Brain gene list with 'fold change ³1.5, p< 0.05' in Npc1-/- mice
Gene	Accession	EntrezGene	Control mean signal	NPC mean signal	Fold change	P value
Lyz1: lysozyme 1	AV058500	17110	200.09	2440.83	12.2	0.000254
Clec7a: C-type lectin domain family 7, member a	NM_020008	56644	28.89	322.58	11.16	0.000127
Gm11428: predicted gene 11428	AA666504	100034251	16.96	175.11	10.32	0.00453
Lyz2: lysozyme 2	AW208566	17105	218.35	2100.21	9.62	0.000517
Gp49a /// Lilrb4: glycoprotein 49 A /// leukocyte immunoglobulin-like receptor, subfamily B, member 4	U05264	14727 /// 14728	40.1	338.32	8.44	0.001593
Itgax: integrin alpha X	NM_021334	16411	17.75	125.81	7.09	0.000176
Mpeg1: macrophage expressed gene 1	L20315	17476	269.6	1598.97	5.93	1.8e-05
Cd84: CD84 antigen	NM_013489	12523	22.5	132	5.87	0.000821
Gpnmb: glycoprotein (transmembrane) nmb	NM_053110	93695	73.27	391.05	5.34	0.002506
H19: H19 fetal liver mRNA	NM_023123	14955	35.08	171.89	4.9	0.001533
Fcgr2b: Fc receptor, IgG, low affinity IIb	BM224327	14130	76.53	335.3	4.38	0.000644
Tnfaip2: tumor necrosis factor, alpha-induced protein 2	BB233088	21928	35.78	154.63	4.32	6.5e-05
Ms4a7: membrane-spanning 4-domains, subfamily A, member 7	BC024402	109225	38.89	168.07	4.32	0.003816
Cd68: CD68 antigen	BC021637	12514	160.38	682.81	4.26	0.000274
Ifit1: interferon-induced protein with tetratricopeptide repeats 1	NM_008331	15957	45.17	191.96	4.25	0.000127
C4b: complement component 4B (Childo blood group)	NM_009780	12268	457.6	1893.94	4.14	4.1e-05
Gfap: glial fibrillary acidic protein	BB183081	14580	832.66	3449.45	4.14	0.000161
C3ar1: complement component 3a receptor 1	BB333624	12267	45.34	180.87	3.99	4.2e-05
LOC100048346 /// Usp18: similar to ubiquitin specific protease UBP43 /// ubiquitin specific peptidase 18	NM_011909	100048346 /// 24110	45.24	176.76	3.91	1e-06
Trem2: triggering receptor expressed on myeloid cells 2	NM_031254	83433	65.37	253.75	3.88	0.000142
C1qb: complement component 1, q subcomponent, beta polypeptide	BB111335	12260	163.55	604.38	3.7	2e-05
Lgals3bp: lectin, galactoside-binding, soluble, 3 binding protein	NM_011150	19039	117.15	424.78	3.63	0.000126
Ms4a6d: membrane-spanning 4-domains, subfamily A, member 6D	NM_026835	68774	53.83	193.84	3.6	0.003123
Ifi44: interferon-induced protein 44	BB329808	99899	58.02	208.61	3.6	7e-06
Tyrobp: TYRO protein tyrosine kinase binding protein	NM_011662	22177	527	1832.56	3.48	1.2e-05
H2-D1: histocompatibility 2, D region locus 1	J00406	14964	313.39	1066.98	3.4	0.000201
Lgals3: lectin, galactose binding, soluble 3	X16834	16854	223.59	756.15	3.38	0.000362
Oasl2: 2'-5' oligoadenylate synthetase-like 2	BQ033138	23962	62.85	211.26	3.36	1e-06
H2-D1 /// H2-L /// LOC636948: histocompatibility 2, D region locus 1 /// histocompatibility 2, D region /// similar to H-2 class I histocompatibility antigen, D-B alpha chain precursor (H-2D(B))	X00246	14964 /// 14980 /// 636948	288.64	969.38	3.36	0.000195
Aspg: asparaginase homolog (S. cerevisiae)	BI146987	104816	89.91	299.37	3.33	0.000335
Myo1f: myosin IF	AK021181	17916	46.55	151.87	3.26	3e-06
C1qc: complement component 1, q subcomponent, C chain	NM_007574	12262	549.18	1775.29	3.23	1.1e-05
Ifi27l2a: interferon, alpha-inducible protein 27 like 2A	AY090098	76933	53.29	169.44	3.18	8e-06
Cyba: cytochrome b-245, alpha polypeptide	AK018713	13057	109.29	339.52	3.11	0.000193
Apobec1: apolipoprotein B mRNA editing enzyme, catalytic polypeptide 1	BC003792	11810	103.55	313.87	3.03	0.000466
Emr1: EGF-like module containing, mucin-like, hormone receptor-like sequence 1	U66888	13733	121.09	340.24	2.81	0
Bcl2a1a /// Bcl2a1b /// Bcl2a1d: B-cell leukemia/lymphoma 2 related protein A1a /// B-cell leukemia/lymphoma 2 related protein A1b /// B-cell leukemia/lymphoma 2 related protein A1d	L16462	12044 /// 12045 /// 12047	74.63	207.79	2.78	0.002436
Mm.89848.1	AW215795		83.77	231.8	2.77	0.000591
C1qa: complement component 1, q subcomponent, alpha polypeptide	NM_007572	12259	1296.31	3523.07	2.72	2.9e-05
Rtp4: receptor transporter protein 4	BC024872	67775	137.2	365.12	2.66	2e-06
Serpina3n: serine (or cysteine) peptidase inhibitor, clade A, member 3N	NM_009252	20716	299.77	729.96	2.44	0.010864
H2-D1 /// H2-K1 /// LOC100044874: histocompatibility 2, D region locus 1 /// histocompatibility 2, K1, K region /// similar to H-2K(d) antigen	L23495	100044874 /// 14964 /// 14972	279.47	681.46	2.44	3.2e-05
Mm.29940.1	AA266723		71.21	171.62	2.41	0.001245
Ctsz: cathepsin Z	NM_022325	64138	399.54	954.28	2.39	3.8e-05
A2m /// LOC677369: alpha-2-macroglobulin /// hypothetical protein LOC677369	BB185854	232345 /// 677369	218.71	523.75	2.39	0.025787
H2-K1: histocompatibility 2, K1, K region	S70184	14972	251.33	598.38	2.38	4.6e-05
Itgb2: integrin beta 2	NM_008404	16414	84.15	195.5	2.32	0.000206
Ms4a6b: membrane-spanning 4-domains, subfamily A, member 6B	NM_027209	69774	92.99	215.51	2.32	0.005973
Cd44: CD44 antigen	AW146109	12505	232.65	529.88	2.28	0.000309
Grn: granulin	M86736	14824	602.17	1363.39	2.26	1.1e-05
Osmr: oncostatin M receptor	AB015978	18414	125.02	278.6	2.23	0.000284
Fcrls: Fc receptor-like S, scavenger receptor	BC016551	80891	128.21	282.02	2.2	2e-05
B2m: beta-2 microglobulin	BF715219	12010	1572.26	3326.71	2.12	4.3e-05
Fcgr3: Fc receptor, IgG, low affinity III	NM_010188	14131	347.05	730.66	2.11	0.000183
Slc11a1: solute carrier family 11 (proton-coupled divalent metal ion transporters), member 1	NM_013612	18173	96.4	200.43	2.08	0.000286
C920025E04Rik /// H2-T23: RIKEN cDNA C920025E04 gene /// histocompatibility 2, T region locus 23	NM_010398	15040 /// 667803	279	577.19	2.07	0.000122
Ugt1a1 /// Ugt1a10 /// Ugt1a2 /// Ugt1a5 /// Ugt1a6a /// Ugt1a6b /// Ugt1a7c /// Ugt1a9: UDP glucuronosyltransferase 1 family, polypeptide A1 /// UDP glycosyltransferase 1 family, polypeptide A10 /// UDP glucuronosyltransferase 1 family, polypeptide A2 /// UDP glucuronosyltransferase 1 family, polypeptide A5 /// UDP glucuronosyltransferase 1 family, polypeptide A6A /// UDP glucuronosyltransferase…	D87867	22236 /// 394430 /// 394432 /// 394433 /// 394434 /// 394435 /// 394436 /// 94284	186.87	384.6	2.06	0.015115
H2-L: histocompatibility 2, D region	M69068	14980	539.55	1098.86	2.04	0.000538
Plek: pleckstrin	AF181829	56193	194.3	390.09	2.01	0.000217
Ifit3: interferon-induced protein with tetratricopeptide repeats 3	NM_010501	15959	157.83	314.69	1.99	0.00026
Vim: vimentin	M24849	22352	1408.8	2798.16	1.99	0.002182
Ifitm3: interferon induced transmembrane protein 3	BC010291	66141	869.67	1722.2	1.98	0
Ctss: cathepsin S	NM_021281	13040	2588.81	5045.84	1.95	0.000317
AU020206: expressed sequence AU020206	BI151331	101757	143.99	280.19	1.95	0.000165
Laptm5: lysosomal-associated protein transmembrane 5	BB218107	16792	423.28	820.5	1.94	9e-06
Ctla2a /// Ctla2b: cytotoxic T lymphocyte-associated protein 2 alpha /// cytotoxic T lymphocyte-associated protein 2 beta	NM_007796	13024 /// 13025	313.35	603.18	1.92	0.003706
Ctsd: cathepsin D	NM_009983	13033	2932.95	5467.69	1.86	1.2e-05
Fermt3: fermitin family homolog 3 (Drosophila)	BB113173	108101	146.79	272.73	1.86	2.4e-05
Lgals1: lectin, galactose binding, soluble 1	AI642438	16852	917.41	1693.11	1.85	0.000354
Lgals9: lectin, galactose binding, soluble 9	NM_010708	16859	141.05	261.26	1.85	1.3e-05
Timp2: tissue inhibitor of metalloproteinase 2	M93954	21858	870.61	1614.41	1.85	0.000227
Irgm1: immunity-related GTPase family M member 1	NM_008326	15944	196.75	362.77	1.84	0.00018
Ptprc: protein tyrosine phosphatase, receptor type, C	NM_011210	19264	148.17	273.25	1.84	0.000205
Cebpd: CCAAT/enhancer binding protein (C/EBP), delta	BB831146	12609	343.23	627.75	1.83	0.001183
Gbp3: guanylate binding protein 3	NM_018734	55932	177.78	322.77	1.82	0.000748
Slc14a1: solute carrier family 14 (urea transporter), member 1	AW556396	108052	365.5	665.53	1.82	4.3e-05
Plscr2: phospholipid scramblase 2	NM_008880	18828	133.61	236.29	1.77	0.001254
S100a6: S100 calcium binding protein A6 (calcyclin)	NM_011313	20200	696.15	1231.79	1.77	0.000237
Anxa4: annexin A4	NM_013471	11746	148.11	259.11	1.75	3.5e-05
Acer2: alkaline ceramidase 2	AF282864	230379	310.14	544.24	1.75	0.00147
Blnk: B-cell linker	AF068182	17060	202.6	351.28	1.73	0.000115
Aldoc: aldolase C, fructose-bisphosphate	BC008184	11676	830.82	1432.27	1.72	0.001626
Ctla2a: cytotoxic T lymphocyte-associated protein 2 alpha	NM_007796	13024	406.75	699.99	1.72	0.003217
Man2b1: mannosidase 2, alpha B1	BC005430	17159	748.25	1278.51	1.71	7e-06
Tspan4: tetraspanin 4	NM_053082	64540	553.46	948.23	1.71	0.006905
Aif1: allograft inflammatory factor 1	NM_019467	11629	159.21	267.1	1.68	0.000907
S1pr3: sphingosine-1-phosphate receptor 3	AV238324	13610	365.45	612.34	1.68	0.000598
Fcer1g: Fc receptor, IgE, high affinity I, gamma polypeptide	NM_010185	14127	462.12	762.59	1.65	0.007905
Itpkb: inositol 1,4,5-trisphosphate 3-kinase B	BE196957	320404	508.88	838.62	1.65	0.023821
Ly86: lymphocyte antigen 86	NM_010745	17084	518.39	849.87	1.64	0.00116
Naglu: alpha-N-acetylglucosaminidase (Sanfilippo disease IIIB)	NM_013792	27419	199.45	326.36	1.64	0.000225
Pdlim4: PDZ and LIM domain 4	NM_019417	30794	264.93	435.64	1.64	0.000319
Hexb: hexosaminidase B	NM_010422	15212	1877.68	3038.01	1.62	0.000157
Ifitm2: interferon induced transmembrane protein 2	NM_030694	80876	532.59	859.67	1.61	0.002156
Plce1: phospholipase C, epsilon 1	AV306884	74055	354.51	570.69	1.61	0.010149
Zc3hav1: zinc finger CCCH type, antiviral 1	BB757349	78781	254.92	407.31	1.6	5.4e-05
Ucp2: uncoupling protein 2 (mitochondrial, proton carrier)	AW108044	22228	304.78	487.13	1.6	0.001502
Lrrc8a /// Phyhd1: leucine rich repeat containing 8A /// phytanoyl-CoA dioxygenase domain containing 1	AK005293	227696 /// 241296	438.28	696.08	1.59	0.010308
Angpt1: angiopoietin 1	BB453314	11600	186.7	294.8	1.58	0.001807
Rnf213: ring finger protein 213	AW556558	672511	287.75	455.79	1.58	1.1e-05
Il10rb: interleukin 10 receptor, beta	NM_008349	16155	294.38	461.03	1.57	5e-06
Sgpl1: sphingosine phosphate lyase 1	NM_009163	20397	319.17	500.64	1.57	9.1e-05
Gusb: glucuronidase, beta	NM_010368	110006	189.29	297.37	1.57	0.000269
Plin2: perilipin 2	NM_007408	11520	366.54	570.36	1.56	8e-06
Ifi35: interferon-induced protein 35	AW986054	70110	183.83	284.38	1.55	5.3e-05
Ctsb: cathepsin B	M14222	13030	535.58	825.03	1.54	0.000337
Syngr1: synaptogyrin 1	NM_009303	20972	268.92	413.68	1.54	0.000835
Ly6a: lymphocyte antigen 6 complex, locus A	BC002070	110454	342.09	528.22	1.54	0.004751
Mafb: v-maf musculoaponeurotic fibrosarcoma oncogene family, protein B (avian)	AW412521	16658	237.5	363.97	1.53	0.00583
Serping1: serine (or cysteine) peptidase inhibitor, clade G, member 1	NM_009776	12258	269.89	412.48	1.53	0.003545
Fmod: fibromodulin	BB504826	14264	211.58	324	1.53	0.017723
Rlbp1: retinaldehyde binding protein 1	NM_020599	19771	278.04	421.88	1.52	0.000181
Ctla2b: cytotoxic T lymphocyte-associated protein 2 beta	BG064656	13025	252.62	382.4	1.51	0.001745
Fxyd1: FXYD domain-containing ion transport regulator 1	NM_019503	56188	1074.03	1622.02	1.51	0.001088
Gm3756 /// Gm5620 /// Gm7172 /// LOC100044416 /// LOC100045728 /// Tuba1a /// Tuba1b /// Tuba1c: predicted gene 3756 /// predicted gene 5620 /// predicted gene 7172 /// similar to alpha-tubulin isotype M-alpha-2 /// similar to tubulin, alpha 1 /// tubulin, alpha 1A /// tubulin, alpha 1B /// tubulin, alpha 1C	NM_009448	100042266 /// 100044416 /// 100045728 /// 22142 /// 22143 /// 22146 /// 434428 /// 636070	200.91	303.17	1.51	0.000853
Rnf13: ring finger protein 13	NM_011883	24017	440.88	293.37	-1.5	0.045834
Efhd1: EF hand domain containing 1	BC019531	98363	1096.99	730.15	-1.5	0.022933
Dock10: dedicator of cytokinesis 10	BF715043	210293	938.75	619.76	-1.51	0.000667
Car2: carbonic anhydrase 2	NM_009801	12349	5719.19	3755.81	-1.52	0.000378
Trf: transferrin	AF440692	22041	2538.39	1665.07	-1.52	0.016579
Pllp: plasma membrane proteolipid	BC024534	67801	1200.81	789.31	-1.52	0.010476
Plcl1: phospholipase C-like 1	BB451636	227120	376.12	246.26	-1.53	0.000631
Gal3st1: galactose-3-O-sulfotransferase 1	AK002510	53897	407.99	265.48	-1.54	0.008385
Josd2: Josephin domain containing 2	NM_025368	66124	544.41	352.64	-1.54	0.000462
Tmeff2: transmembrane protein with EGF-like and two follistatin-like domains 2	NM_019790	56363	1746.84	1117.57	-1.56	6.6e-05
2810468N07Rik: RIKEN cDNA 2810468N07 gene	AK013390	72834	739.63	473.26	-1.56	3.3e-05
Tmem63a: transmembrane protein 63a	BC019442	208795	653.53	417.9	-1.56	0.009784
Plp1: proteolipid protein (myelin) 1	BB768495	18823	13121.9	8354.8	-1.57	0.002252
Sox10: SRY-box containing gene 10	BC018551	20665	791.08	505.38	-1.57	0.001083
D16Ertd472e: DNA segment, Chr 16, ERATO Doi 472, expressed	AV381575	67102	604.19	385.82	-1.57	2.4e-05
Gsn: gelsolin	AV025559	227753	1283.58	816.04	-1.57	0.037158
Mm.33903.2	BB194318		391.81	250.33	-1.57	0.006286
Klhl4: kelch-like 4 (Drosophila)	BB037068	237010	463.65	293.34	-1.58	0.004052
Kif5a: kinesin family member 5A	NM_008447	16572	487.63	305.82	-1.59	0.006897
Pde8a: phosphodiesterase 8A	BB220000	18584	975.58	612.1	-1.59	0.002264
Tmem125: transmembrane protein 125	AV332097	230678	303.04	190.32	-1.59	0.048119
Prrg1: proline rich Gla (G-carboxyglutamic acid) 1	BM230193	546336	305.98	191.67	-1.6	0.011403
Gamt: guanidinoacetate methyltransferase	AF015887	14431	423.27	262.1	-1.61	0.000916
Il1rap: interleukin 1 receptor accessory protein	BE285634	16180	293.26	181	-1.62	0.006587
Cnp: 2',3'-cyclic nucleotide 3' phosphodiesterase	BB251922	12799	7698.18	4719.79	-1.63	0.002728
Gm98: predicted gene 98	BB193557	225908	681.5	416.98	-1.63	0.011031
Myo1d: myosin ID	C76327	338367	398.87	244.13	-1.63	0.002027
Grb14: growth factor receptor bound protein 14	NM_016719	50915	1427.16	870.18	-1.64	0.00025
Eps8l2: EPS8-like 2	NM_133191	98845	468.59	285.93	-1.64	0.001337
Spnb2: spectrin beta 2	AV016275	20742	462.33	280.18	-1.65	0.016017
Prr18: proline rich region 18	BB081437	320111	566.13	341.38	-1.66	0.008298
Plekhh1: pleckstrin homology domain containing, family H (with MyTH4 domain) member 1	AV336001	211945	989.37	582.38	-1.7	0.007637
Plxnb3: plexin B3	AI451018	140571	485.31	282.88	-1.72	0.002385
Lpar1: lysophosphatidic acid receptor 1	U70622	14745	477.35	275.77	-1.73	0.0007
Mag: myelin-associated glycoprotein	NM_010758	17136	2372.42	1359.31	-1.75	0.008403
E330037M01Rik: RIKEN cDNA E330037M01 gene	BB070287	319775	425.15	242.93	-1.75	0.000245
Cldn11: claudin 11	NM_008770	18417	4615.44	2595.43	-1.78	0.001297
Anln: anillin, actin binding protein	BI690018	68743	821.36	462.23	-1.78	0.003074
Kif5b: kinesin family member 5B	BI328541	16573	638.73	355.48	-1.8	0.016078
Trim59: tripartite motif-containing 59	NM_025863	66949	318.97	177.18	-1.8	0.00136
Elovl7: ELOVL family member 7, elongation of long chain fatty acids (yeast)	BB338945	74559	446.5	248.01	-1.8	0.002272
Abca8a: ATP-binding cassette, sub-family A (ABC1), member 8a	BC026496	217258	389.84	212.52	-1.83	0.000926
Serpinb1a: serine (or cysteine) peptidase inhibitor, clade B, member 1a	AF426024	66222	369.24	200.58	-1.84	0.01607
Itgb4: integrin beta 4	L04678	192897	236.71	128.98	-1.84	0.003784
Aspa: aspartoacylase	BC024934	11484	945.87	509.37	-1.86	0.002155
Evi2a: ecotropic viral integration site 2a	NM_010161	14017	940.45	493.09	-1.91	0.00041
Sox2ot: SOX2 overlapping transcript (non-protein coding)	BB307661	320478	735.28	383.56	-1.92	2e-06
Ppp1r14a: protein phosphatase 1, regulatory (inhibitor) subunit 14A	NM_026731	68458	773	395.54	-1.95	0.003677
S1pr5: sphingosine-1-phosphate receptor 5	NM_053190	94226	387.37	198.84	-1.95	0.004939
Fa2h: fatty acid 2-hydroxylase	BM118638	338521	1963.84	1003.46	-1.96	0.009776
Tspan2: tetraspanin 2	BC007185	70747	2492.07	1263.15	-1.97	0.000317
Gpr37: G protein-coupled receptor 37	BQ175510	14763	1067.87	537.02	-1.99	0.000182
Erbb3: v-erb-b2 erythroblastic leukemia viral oncogene homolog 3 (avian)	BF140685	13867	452.53	220.68	-2.05	0.000681
Ugt8a: UDP galactosyltransferase 8A	NM_011674	22239	3795.15	1788.14	-2.12	0.010762
1700047M11Rik: RIKEN cDNA 1700047M11 gene	BB534060	67330	285.55	134.63	-2.12	0.001933
Adamts4: a disintegrin-like and metallopeptidase (reprolysin type) with thrombospondin type 1 motif, 4	BB443585	240913	639.22	300.04	-2.13	0.001274
Mog: myelin oligodendrocyte glycoprotein	U64572	17441	1065.57	487.06	-2.19	0.004655
AI314604: expressed sequence AI314604	BE991175	102027	460.21	203.97	-2.26	0.01306
Ermn: ermin, ERM-like protein	AV328226	77767	1395.29	604.31	-2.31	0.000531
Mbp: myelin basic protein	L07509	17196	5464.67	2350.26	-2.33	0.006713
Npc1: Niemann Pick type C1	BB769209	18145	425.5	182.05	-2.34	3e-06
A230069A22Rik: RIKEN cDNA A230069A22 gene	AV327597	320587	1317.45	564.01	-2.34	7.6e-05
Mobp: myelin-associated oligodendrocytic basic protein	AI839848	17433	2183.98	928.67	-2.35	0.003931
Mal: myelin and lymphocyte protein, T-cell differentiation protein	NM_010762	17153	4911.34	1887.13	-2.6	6.6e-05
Car3: carbonic anhydrase 3	NM_007606	12350	184.55	68.72	-2.69	0.033343
Opalin: oligodendrocytic myelin paranodal and inner loop protein	AW490730	226115	647.37	212.72	-3.04	1e-06
9630013A20Rik: RIKEN cDNA 9630013A20 gene	BB247407	319903	166.2	50.8	-3.27	0.024928
Mm.116729.3	BG083989		655.52	198.57	-3.3	0.026578
Mm.116729.1	C79035		416.41	114.95	-3.62	0.036357
Mm.35341.1	AI506888		215.36	48.1	-4.48	0.041767
CU041261.1 /// LOC100189605 /// Mup1 /// Mup10 /// Mup12 /// Mup2 /// Mup7 /// Mup8: major urinary protein LOC100048885 /// major urinary protein 17 /// major urinary protein 1 /// major urinary protein 10 /// major urinary protein 12 /// major urinary protein 2 /// major urinary protein 7 /// major urinary protein 8	NM_031188	100039008 /// 100039054 /// 100041658 /// 100041687 /// 100048885 /// 100189605 /// 17840 /// 17841	414.43	38.74	-10.7	0.020934
Genes shown in bold are innate innate immunity genes catalogoued by Innate Immunity Databsae (IDB).
Innate immunity genes up regulated -28
Innate immunity genes down regulated -1
