# Supplementary material for: Genomic Expression Analyses Reveal Lysosomal, Innate Immunity Proteins, as Disease Correlates in Murine Models of a Lysosomal Storage Disorder
Source: PLoS One. 2012 Oct 19;7(10):e48273. doi: 10.1371/journal.pone.0048273 (PMC3477142; doi:10.1371/journal.pone.0048273)
Supplement: Table S4 — Enrichment of top 10 biofunctions pathways and their associated genes in brain, liver and spleen of Npc1 −/− mice. (XLS) [file pone.0048273.s007.xls]

## Sheet: Sheet1
Top 10 biofunctions and associated genes enriched in the brain of Npc1-/- mice
Functions Annotation	# Molecules	Molecules	p-Value
immune response	53	A2M,AIF1,ANGPT1,B2M,BLNK,C1QA,C1QB,C3AR1,C4B (includes others),CA2,CA3,CD44,CD84,CEBPD,CLEC7A,CTSD,CTSS,CYBA,FCER1G,FCGR2A,FCGR2B,FERMT3,FMOD,GRN,HLA-C,IFI27L2,IFI44,IFITM2,IFITM3,IL10RB,IL1RAP,ITGAX,ITGB2,LGALS1,LGALS9B,LY86,Lyz1/Lyz2,MBP,MOG,MYO1F,NPC1,OSMR,PLP1,PTPRC,S1PR3,SERPINA3,SERPING1,SLC11A1,TF,TIMP2,TREM2,TYROBP,ZC3HAV1	2.91e-16
leukocyte migration	33	ANGPT1,C3AR1,C4B (includes others),CD44,CNP,CTSB,CTSS,CTSZ,FCER1G,FCGR2A,FCGR2B,FERMT3,GAL3ST1,GFAP,GSN,IRGM,ITGAX,ITGB2,LGALS1,LGALS3,Ly6a (includes others),Lyz1/Lyz2,MOG,PLP1,PTPRC,S1PR3,S1PR5,SERPINA3,SERPING1,TIMP2,TREM2,TYROBP,UCP2	2.23e-11
inflammation	25	ANGPT1,B2M,C3AR1,CA2,CA3,CD44,CEBPD,CTSD,CTSS,CYBA,FCER1G,FCGR2A,FCGR2B,FERMT3,GRN,ITGAX,ITGB2,LGALS1,MOG,NPC1,PLP1,PTPRC,SLC11A1,TF,TYROBP	3.32e-11
cell movement of leukocytes	27	ANGPT1,C3AR1,C4B (includes others),CD44,CNP,CTSB,CTSS,FCER1G,FCGR2A,FCGR2B,FERMT3,GAL3ST1,GFAP,GSN,IRGM,ITGAX,ITGB2,LGALS1,LGALS3,MOG,PLP1,PTPRC,S1PR3,SERPINA3,SERPING1,TIMP2,UCP2	1.71e-10
migration of cells	50	A2M,AIF1,ANGPT1,C3AR1,C4B (includes others),CA3,CD44,CLDN11,CNP,CTSB,CTSD,CTSS,CTSZ,ERBB3,FCER1G,FCGR2A,FCGR2B,FERMT3,GAL3ST1,GFAP,Gm11428,GRN,GSN,IRGM,ITGAX,ITGB2,ITGB4,LGALS1,LGALS3,LPAR1,Ly6a (includes others),Lyz1/Lyz2,MAFB,MOG,MYO1F,PLCL1,PLP1,PTPRC,S100A6,S1PR3,S1PR5,SERPINA3,SERPING1,SGPL1,TIMP2,TMEFF2,TREM2,TYROBP,UCP2,VIM	3.16e-10
cell movement	51	A2M,AIF1,ANGPT1,C3AR1,C4B (includes others),CA3,CD44,CLDN11,CNP,CTSB,CTSD,CTSS,CTSZ,ERBB3,FCER1G,FCGR2A,FCGR2B,FERMT3,GAL3ST1,GFAP,Gm11428,GRN,GSN,IRGM,ITGAX,ITGB2,ITGB4,LGALS1,LGALS3,LPAR1,Ly6a (includes others),Lyz1/Lyz2,MAFB,MOG,MYO1F,NPC1,PLCL1,PLP1,PTPRC,S100A6,S1PR3,S1PR5,SERPINA3,SERPING1,SGPL1,TIMP2,TMEFF2,TREM2,TYROBP,UCP2,VIM	1.34e-09
mobilization of Ca2+	19	A2M,B2M,BLNK,C3AR1,C4B (includes others),CD44,FCER1G,FCGR2A,FCGR2B,ITGB2,LGALS1,LGALS3,LPAR1,Ly6a (includes others),MBP,PLCE1,PTPRC,S1PR3,TYROBP	8.35e-09
activation of cells	30	ANGPT1,B2M,BCL2A1,C1QA,C3AR1,C4B (includes others),CD44,CD84,CLEC7A,FCER1G,FCGR2A,FCGR2B,GFAP,Gp49a/Lilrb4,HLA-C,ITGAX,ITGB2,LGALS3,MAG,MBP,MOG,NPC1,PLEK,PLP1,PTPRC,SERPING1,SLC11A1,TREM2,TYROBP,VIM	1.17e-08
hypomyelination	6	GAL3ST1,MAG,MAL,MBP,PLP1,TYROBP	2.53e-08
cell movement of phagocytes	20	ANGPT1,C3AR1,C4B (includes others),CD44,CNP,CTSB,CTSS,FCER1G,FCGR2A,GAL3ST1,GSN,IRGM,ITGAX,ITGB2,LGALS1,MOG,PLP1,SERPINA3,SERPING1,TIMP2	2.57e-08
Top 10 biofunctions and associated genes enriched in the liver of Npc1-/- mice
Functions Annotation	# Molecules	Molecules	p-Value
metabolism of lipid	180	ABCB11,ABCD2,ABCD3,ABCG1,ACAA1,ACAA2,ACAD8,ACLY,ACOT1,Acot1,ACOT12,ACOT2,ACOT4,ACSL1,ACSM1,ADH4 (includes EG:127),AKR1B1,Akr1c14,AKR1D1,ALDH1A1,ALDH8A1,ANXA1,APOBEC1,AQP9,ASAH1,ASPA,ASPG,ATP8A1,AVPR1A,B4GALNT1,B4GALT6,BAAT,BCL2L1,BCL2L11,CD36,CD74,CD9,CERK,CHKA,CHPT1,CLEC7A,CLN3,CLN6,CLN8,COTL1,CPT2,CROT,CSF1R,CYP27A1,CYP2B6,CYP2C19,Cyp2c44,CYP2G1P,CYP2J2,Cyp2j5,CYP2R1,CYP3A4,CYP4F12,CYP7A1,CYP7B…	8.7e-21
fatty acid metabolism	117	ABCB11,ABCD2,ABCD3,ABCG1,ACAA1,ACAA2,ACLY,Acot1,ACOT1,ACOT12,ACOT2,ACOT4,ACSL1,ACSM1,ANXA1,AQP9,ASAH1,ATP8A1,AVPR1A,B4GALNT1,B4GALT6,BCL2L1,BCL2L11,CD36,CD74,CD9,CERK,CHKA,CLEC7A,CLN3,COTL1,CPT2,CROT,CYP27A1,CYP2C19,Cyp2c44,CYP2J2,Cyp2j5,CYP3A4,CYP4F12,CYP7A1,DAB1,DECR1,DLD,EHHADH,EIF2AK3,ELOVL5,ELOVL7,FABP2,FABP4,FABP5,FAS,FCER1G,FCGR2A,FCGR2B,FGFR3,GBA,GCDH,GHR,GLTP,GLYAT,GSN,HAO2,HNF4A,HSD17B4…	9.94e-21
immune response	209	ADIPOR2,ALCAM,ANXA1,ANXA2,ANXA3,ANXA5,APRT,AQP9,ARHGDIB,ARRB2,ATG5,B2M,BCL2L1,BCL2L11,BLNK,C1QA,C1QB,C3AR1,C9,CA1,CA3,CA5A,CADM1,CAMP,CAPG,CBLB,Ccl6,CCRL2,CD163,CD180,CD1D,CD200,Cd24a,CD274,CD300A,CD36,CD44 (includes EG:100330801),CD74,CD83,CD84,CD93,Ceacam1,CELA1,CERK,CFHR1,Chi3l3/Chi3l4,CLEC7A,CORO1A,CRLF2,CSF1R,CSF2RA,CSF2RB,CTSC,CTSD,CTSE,CTSS,CXCL16,CXCR4,CYBA,CYBB,Defb1,DGKZ,DIAPH1,DOCK2,DU…	5.69e-17
movement of cells	227	ABL2,ADAMTS7,ALCAM,ALDOA,AMOT,ANXA1,ANXA2,ANXA3,ANXA5,APLP2,AQP1,ARHGDIB,ARPC1B,ARRB2,ATF3,BTG2,C3AR1,C9,CA3,CADM1,CAMP,CAP1,CARD10,CBL,CBLB,Ccl6,CD200,Cd24a,CD274,CD36,CD44 (includes EG:100330801),Cd59a,CD74,CD9,CD93,Cd99 (mouse),CDH1,Ceacam1,CFL1,Chi3l3/Chi3l4,CITED2,CORO1A,CSF1R,CSF2RA,CSF2RB,CTGF,CTSB,CTSD,CTSE,CTSS,CTSZ,CXCL16,CXCR4,CYBB,CYP2J2,CYTIP,DAB1,DDX3X,DIAPH1,DOCK2,DOCK4,DPYSL2,Ear2…	2.14e-10
activation of cells	125	ANK3,ANXA1,ANXA2,ATG5,B2M,BCL2A1,BCL2L1,C1QA,C3AR1,CADM1,CAMP,CBLB,CD163,CD180,CD1D,CD200,Cd24a,CD274,CD300A,CD36,CD44 (includes EG:100330801),CD74,CD83,CD84,CD9,CD93,CDH1,CDKN1C,Ceacam1,CERK,CFL1,CLEC7A,CORO1A,CSF1R,CTGF,CXCR4,CYBB,DOCK2,DUSP3,EGR2,ENTPD1,ENTPD2,F2R,FAS,FCER1G,FCGR2A,FCGR2B,FGF1,FKBP1A,GNA13,GNAI2,Gp49a/Lilrb4,GRB2,HBP1,HCK,HLA-DQA1,HLA-DQB1,HLA-DRA,HLA-DRB1,HNF4A,HSPB8,ICAM1,IF…	2.22e-10
migration of cells	226	ABL2,ADAMTS7,ALCAM,ALDOA,AMOT,ANXA1,ANXA2,ANXA3,ANXA5,APLP2,AQP1,ARHGDIB,ARPC1B,ARRB2,ATF3,BTG2,C3AR1,C9,CA3,CAMP,CAP1,CARD10,CBL,CBLB,Ccl6,CD200,Cd24a,CD274,CD36,CD44 (includes EG:100330801),Cd59a,CD74,CD9,CD93,Cd99 (mouse),CDH1,Ceacam1,CFL1,Chi3l3/Chi3l4,CITED2,CORO1A,CSF1R,CSF2RA,CSF2RB,CTGF,CTSB,CTSD,CTSE,CTSS,CTSZ,CXCL16,CXCR4,CYBB,CYP2J2,CYTIP,DAB1,DDX3X,DIAPH1,DOCK2,DOCK4,DPYSL2,Ear2 (incl…	2.47e-10
synthesis of lipid	109	ABCG1,ACLY,ACSL1,ACSM1,ADH4 (includes EG:127),Akr1c20,AKR1D1,ALDH1A1,ALDH8A1,ANXA1,ASAH1,ASPA,AVPR1A,B4GALNT1,B4GALT6,BCL2L1,BCL2L11,CD74,CD9,CERK,CHKA,CHPT1,CLEC7A,CLN3,COTL1,CYP27A1,CYP2R1,CYP7A1,CYP7B1,DAB1,DECR1,DIAPH1,DLD,EIF2AK3,ELOVL1,ELOVL5,ELOVL7,FABP5,FAS,FCER1G,FCGR2A,FCGR2B,FGF1,FGFR3,G6PD,GBA,GCDH,GHR,GLA,HEXB,HNF4A,HOMER2,HSD17B12,HSD17B2,IGF1,IGFBP4,IL1A,ITGB2,LARGE,LIPC,LPIN2,LPL,…	7.49e-10
migration of blood cells	117	ANXA1,ANXA5,ARRB2,C3AR1,C9,CAMP,CBL,CBLB,Ccl6,CD200,Cd24a,CD274,CD36,CD44 (includes EG:100330801),Cd59a,CD74,CD93,Cd99 (mouse),Ceacam1,Chi3l3/Chi3l4,CORO1A,CSF1R,CSF2RA,CTGF,CTSB,CTSE,CTSS,CTSZ,CXCL16,CXCR4,CYBB,CYTIP,DIAPH1,DOCK2,DPYSL2,Ear2 (includes others),F2R,FABP4,FAS,FCER1G,FCGR2A,FCGR2B,FCGR3A,FERMT3,GAB2,GJB2,GNA13,GNAI2,GSN,HCK,ICAM1,IFNGR1,IGFBP3,IL15RA,IL1A,ITGA4,ITGAL,ITGAX,ITGB2,LGA…	8.7e-10
phagocytosis	44	ANXA1,ANXA3,ANXA5,C1QA,CAMP,CAPG,CD36,CD44 (includes EG:100330801),CD93,CERK,CLEC7A,CORO1A,CSF2RB,FAS,FCER1G,FCGR2A,FCGR2B,FOXP1,GAB2,HCK,ICAM1,IQSEC1,IRF8,ITGAX,ITGB2,LAMP2,MFGE8,MSN,MSR1,MYO5A,PF4,PRKX,PSMD4,PTEN,RALB,SIRPA,SLC11A1,SPI1,SYK,TGFB1,TGM2,THBS1,TRPV2,VAMP7	9.96e-10
cell movement	237	ABL2,ADAMTS7,AKR1B1,ALCAM,ALDOA,AMOT,ANXA1,ANXA2,ANXA3,ANXA5,APLP2,AQP1,ARHGDIB,ARPC1B,ARRB2,ATF3,BTG2,C3AR1,C9,CA3,CADM1,CAMP,CAP1,CARD10,CBL,CBLB,Ccl6,CCRL2,CD200,Cd24a,CD274,CD36,CD44 (includes EG:100330801),Cd59a,CD74,CD9,CD93,Cd99 (mouse),CDH1,Ceacam1,CFL1,Chi3l3/Chi3l4,CITED2,CORO1A,CSF1R,CSF2RA,CSF2RB,CTGF,CTSB,CTSD,CTSE,CTSS,CTSZ,CXCL16,CXCR4,CYBB,CYP2J2,CYTIP,DAB1,DDX3X,DIAPH1,DNAJA1,DOC…	1.04e-09
Top 10 biofunctions and associated genes enriched in the spleen of Npc1-/- mice
Functions Annotation	# Molecules	Molecules	p-Value
immune response	58	ADAM8,ALOX12,ANPEP,ANXA1,C6,CAMP,CD163,CD300A,CD4,CD5L,CD86,CD93,CDKN1A,CEBPB,CEBPD,Chi3l3/Chi3l4,CLEC7A,COLEC12,CORO1C,CSF1R,CTSD,CTSL2,CYBB,DUSP3,ELANE,ENTPD1,F10,F5,GBA,GNAZ,GRN,HP,IGF2R,IL18BP,ITGB3,LCN2,LGALS1,LIPA,LRP1,LTB4R,LTF,MARCO,MGST1,MMP12,MMP9,MPO,MSR1,NPY,PGLYRP1,POSTN,PRTN3,S100A8,S100A9,SLC7A2,TCIRG1,TF,TIMD4,TIMP2	7.95e-15
activation of cells	42	ANXA1,C6,CAMP,CD163,CD300A,CD4,CD86,CD93,CDKN1A,CDKN1C,CEBPB,CLEC1B,CLEC7A,CSF1R,CYBB,DUSP3,ELANE,ENTPD1,F10,F5,Gp49a/Lilrb4,GP9,IGF2R,ITGB3,LCN2,LGALS3,LRP1,LTF,MGST1,MMP9,MPO,MSR1,NPY,P2RX4,PPAP2A,PRTN3,PTGIR,S100A9,SERPINE2,SLC7A2,TIMD4,VWF	2.02e-13
activation of blood cells	35	ANXA1,C6,CAMP,CD163,CD300A,CD4,CD86,CD93,CDKN1A,CLEC1B,CLEC7A,CSF1R,DUSP3,ELANE,ENTPD1,F10,F5,GP9,IGF2R,ITGB3,LCN2,LRP1,LTF,MGST1,MPO,MSR1,NPY,PPAP2A,PRTN3,PTGIR,S100A9,SERPINE2,SLC7A2,TIMD4,VWF	5.98e-13
severe acute respiratory syndrome	16	ANPEP,CAMP,CEBPD,CTSZ,FLOT2,GYG1,HP,ITGA2B,LCN2,LTB4R,LTF,PDXK,PGLYRP1,S100A9,TCIRG1,TIMP2	9e-13
cell movement	65	ALOX12,ANPEP,ANXA1,ATF3,C6,CAMP,CD4,CD86,CD93,CDKN1A,Chi3l3/Chi3l4,CITED2,CSF1R,CTSB,CTSD,CTSL2,CTSZ,CTTN,CYBB,ELANE,ENTPD1,F10,F13A1,FABP5,GBA,Gm11428,GNAZ,GP9,GRN,HP,IGF2R,IL18BP,ITGA2B,ITGB3,JUN,LCN2,LGALS1,LGALS3,LGMN,LIPA,LMNA,LRP1,LTB4R,LTF,MMP12,MMP9,MPO,MSR1,NPY,NRP1,OLFM4,PMP22,POSTN,PPAP2A,PRTN3,PTGIR,RHOB,S100A1,S100A8,S100A9,SERPINE2,SGPL1,TCIRG1,TIMP2,VWF	1.95e-12
migration of cells	62	ALOX12,ANPEP,ANXA1,ATF3,C6,CAMP,CD4,CD86,CD93,CDKN1A,Chi3l3/Chi3l4,CITED2,CSF1R,CTSB,CTSD,CTSL2,CTSZ,CTTN,CYBB,ELANE,F10,F13A1,FABP5,Gm11428,GNAZ,GRN,HP,IGF2R,IL18BP,ITGA2B,ITGB3,JUN,LCN2,LGALS1,LGALS3,LGMN,LIPA,LMNA,LRP1,LTB4R,LTF,MMP12,MMP9,MPO,MSR1,NPY,NRP1,OLFM4,PMP22,POSTN,PPAP2A,PRTN3,PTGIR,RHOB,S100A1,S100A8,S100A9,SERPINE2,SGPL1,TCIRG1,TIMP2,VWF	2.53e-12
lysosomal storage disease	13	CTSD,FLOT2,GALC,GBA,GNS,GUSB,HEXA,HEXB,LRP1,NAGLU,NPC2,PSAP,TPP1	5.53e-12
respiratory disorder	35	ALOX12,ANPEP,CAMP,CD4,CD68,CD86,CEBPD,Chi3l3/Chi3l4,CTSZ,CYBB,ELANE,ENTPD1,F10,F5,FLOT2,GYG1,HP,ITGA2B,ITGB3,LCN2,LGALS3,LTB4R,LTF,MMP12,MMP9,MPO,PDXK,PGLYRP1,POSTN,PTGIR,S100A9,TCIRG1,TF,TIMP2,VWF	1.77e-11
psoriasis	32	ANXA1,CAMP,CD4,CD86,CDKN1C,CEBPB,CEBPD,CLEC7A,CSF1R,CSTB,CTSB,CTSL2,F13A1,FABP5,GBA,HAL,JUN,LCN2,LGALS1,LGALS3,LTF,MMP12,MMP9,NRP1,PGD,POSTN,PSAP,S100A8,S100A9,TF,TIMP2,VWF	2.39e-11
binding of blood cells	20	CD4,CD86,ELANE,ENTPD1,F10,F5,GP5,GP9,ITGA2B,ITGB3,LRP1,LTF,MARCO,MPO,MSR1,NPY,PRTN3,RHOB,S100A9,VWF	2.41e-11
